# Supplementary material
Source: Research Square preprint supplement (doi:10.21203/rs.3.rs-8844841/v1)
Supplement: Supplementary file 1 [file ee12ee9a4038634016f58626.docx]

| **Case** | **Breed** | **Sex** | **Age (year)** | **BW (kg)** | **BCS** | **Joint** | **Group** |
| --- | --- | --- | --- | --- | --- | --- | --- |
| 1 | Labrador retriever | M | 11 | 38 | 6 | Shoulder | S |
| 2 | Labrador retriever | M | 11 | 39,7 | 6 | Shoulder | S |
| 3 | Corso | M | 1 | 38 | 5 | Shoulder | S |
| 4 | Corso | M | 2 | 40 | 5 | Shoulder | S |
| 5 | German shepherd | F | 8 | 35,4 | 5 | Elbow | S |
| 6 | Labrador retriever | F | 1 | 28 | 4 | Elbow | S |
| 7 | Mix breed | F | 13 | 15 | 5 | Elbow | S |
| 8 | Mix breed | F | 11 | 17 | 5 | Elbow | S |
| 9 | Mix breed | F | 10 | 25,3 | 5 | Shoulder | S |
| 10 | Mix breed | F | 8 | 27,7 | 5 | Shoulder | S |
| 11 | Mix breed | M | 2 | 45 | 6 | Elbow | S |
| 12 | Mix breed | M | 4 | 41,1 | 5 | Elbow | S |
| 13 | Mix breed | F | 12 | 30,9 | 5 | Shoulder | S |
| 14 | Mix breed | F | 9 | 25 | 5 | Shoulder | S |
| 15 | Mix breed | M | 11 | 25,6 | 5 | Carpus | S |
| 16 | Mix breed | F | 5 | 28 | 5 | Carpus | S |
| 17 | Lagotto romagnolo | M | 10 | 20,1 | 5 | Carpus | S |
| 18 | Schnauzer | F | 9 | 12 | 6 | Shoulder | S |
| 19 | Schnauzer | F | 7 | 13 | 6 | Shoulder | S |
| 20 | Border collie | M | 2 | 16 | 5 | Shoulder | S |
| 21 | Border collie | F | 9 | 15 | 4 | Shoulder | S |
| 22 | Border collie | F | 11 | 18 | 5 | Shoulder | S |
| 23 | German shepherd | F | 9 | 31,3 | 5 | Elbow | HA |
| 24 | Golden retriever | F | 11 | 13 | 5 | Stifle | HA |
| 25 | Bernese mountain dog | M | 1 | 47,5 | 5 | Elbow | HA |
| 26 | Labrador retriever | F | 1 | 28 | 4 | Elbow | HA |
| 27 | Mix breed | F | 13 | 15 | 5 | Carpus | HA |
| 28 | Mix breed | M | 8 | 22 | 5 | Shoulder | HA |
| 29 | Mix breed | F | 8 | 19,2 | 5 | Shoulder | HA |
| 30 | Mix breed | F | 7 | 17,3 | 4 | Shoulder | HA |
| 31 | Labrador retriever | M | 11 | 30 | 6 | Tarsus | HA |
| 32 | Labrador retriever | M | 10 | 27 | 5 | Tarsus | HA |
| 33 | Labrador retriever | M | 7 | 32 | 5 | Hip | HA |
| 34 | Labrador retriever | M | 9 | 37 | 6 | Tarsus | HA |
| 35 | Labrador retriever | F | 8 | 30 | 5 | Hip | HA |
| 36 | Golden retriever | M | 7 | 31 | 5 | Elbow | HA |
| 37 | Mix breed | F | 9 | 21,3 | 5 | Shoulder | HA |
| 38 | Lagotto romagnolo | M | 10 | 19,5 | 5 | Shoulder | HA |
| 39 | German shepherd | F | 9 | 30,3 | 5 | Elbow | HA |
| 40 | Golden retriever | F | 11 | 31,5 | 5 | Stifle | HA |
| 41 | Bernese mountain dog | F | 1 | 45,2 | 5 | Elbow | HA |
| 42 | Labrador retriever | F | 1 | 28 | 5 | Elbow | HA |
| 43 | Labrador retriever | M | 7 | 35,5 | 6 | Tarsus | T |
| 44 | Labrador retriever | M | 8 | 43 | 7 | Tarsus | T |
| 45 | Golden retriever | M | 7 | 41 | 6 | Tarsus | T |
| 46 | Great Dane\ | F | 5 | 49,5 | 5 | Elbow | T |
| 47 | Great Dane | F | 6 | 55 | 5 | Elbow | T |
| 48 | English setter | F | 11 | 15 | 4 | Shoulder | T |
| 49 | English setter | F | 11 | 17 | 5 | Shoulder | T |
| 50 | Mix breed | M | 12 | 10 | 4 | Carpus | T |
| 51 | Labrador retriever | M | 7 | 35 | 5 | Shoulder | T |
| 52 | Labrador retriever | M | 9 | 37 | 6 | Tarsus | T |
| 53 | German shepherd | F | 6 | 29,5 | 4 | Elbow | T |
| 54 | German shepherd | F | 9 | 31,3 | 5 | Elbow | T |
| 55 | German shepherd | F | 7 | 30 | 5 | Elbow | T |
| 56 | English setter | F | 11 | 15 | 4 | Shoulder | T |
| 57 | Mix breed | M | 8 | 10 | 15 | Carpus | T |
| 58 | Labrador retriever | M | 7 | 33 | 5 | Shoulder | T |
| 59 | Labrador retriever | M | 6 | 31,2 | 5 | Tarsus | T |

**Supplementary Table 1S**. Breed, sex, bodyweight (BW), body condition score (BCS), joints affected of patient enrolled in the study.

| **Gr.** |  | **PSI/4** | **PII/6** | **Lam.** | **VAS** | **CRF** | **ROM** | **GLS** | **TPI %** | **OA** | **SS** |
| --- | --- | --- | --- | --- | --- | --- | --- | --- | --- | --- | --- |
| **S** | **T0** | 5,0 ± 2,3 | 5,3 ± 1,9 | 2,8 ± 0,6 | 5,7 ± 2,3 | 21,4 ± 6,2 | 107,5 ± 14,0 | 88,3 ± 5,3 | 26,4 ± 1,6 | 2,6 ± 1,0 | 6,6 ± 3,3 |
|  | **T15** | 4,1 ± 2,7 | 5,4 ± 1,9 | 2,5 ± 0,7 | 5,0 ± 2,0 | 21,6 ± 6,5 | 108,3 ± 12,8 | 90,9 ± 4,7 | 27,3 ± 1,4 | 2,6 ± 1,0 | 4,4 ± 2,5 |
|  | **T30** | 3,7 ± 2,3 | 4,8 ± 1,9 | 2,2 ± 0,7 | 3,9 ± 1,8 | 21,6 ± 6,2 | 111,7 ± 12,8 | 95,3 ± 4,0 | 28,6 ± 1,3 | 2,6 ± 1,0 | 2,5 ± 1,7 |
|  | **T60** | 2,6 ± 1,5 | 3,1 ± 2,1 | 1,8 ± 0,6 | 3,4 ± 2,1 | 21,9 ± 6,6 | 111,4 ± 13,4 | 96,5 ± 4,0 | 28,9 ± 1,3 |  |  |
|  | **T180** | 3,1 ± 1,4 | 3,1 ± 1,3 | 1,8 ± 0,6 | 3,9 ± 1,7 | 23,1 ± 6,1 | 112,8 ± 14,3 | 95,4 ± 3,9 | 28,6 ± 1,2 | 2,8 ± 0,9 | 1,4 ± 1,3 |
| **HA** | **T0** | 5,5 ± 3,3 | 6,3 ± 2,7 | 3,0 ± 0,7 | 6,7 ± 1,9 | 26,2 ± 11,2 | 92,1 ± 24,6 | 85,4 ± 5,0 | 22,6 ± 4,2 | 3,1 ± 0,9 | 6,3 ± 4,2 |
|  | **T15** | 4,6 ± 3,0 | 5,3 ± 2,2 | 2,7 ± 0,7 | 6,4 ± 1,6 | 26,1 ± 11,1 | 92,5 ± 27,3 | 88,0 ± 9,5 | 23,5 ± 5,7 | 3,1 ± 0,9 | 4,7 ± 3,8 |
|  | **T30** | 4,3 ± 2,9 | 4,8 ± 2,0 | 2,4 ± 0,7 | 4,9 ± 2,2 | 26,3 ± 10,9 | 94,5 ± 28,6 | 89,1 ± 10,4 | 23,8 ± 5,8 | 3,1 ± 0,9 | 3,9 ± 3,4 |
|  | **T60** | 4,4 ± 2,8 | 4,9 ± 2,0 | 2,6 ± 0,8 | 4,9 ± 2,2 | 25,6 ± 10,9 | 94,6 ± 28,9 | 89,2 ± 9,8 | 23,8 ± 5,9 |  |  |
|  | **T180** | 3,8 ± 2,4 | 4,3 ± 1,6 | 2,6 ± 0,6 | 4,8 ± 2,0 | 25,5 ± 11,2 | 97,3 ± 28,6 | 89,6 ± 7,5 | 24,1 ± 5,4 | 3,0 ± 0,9 | 4,6 ± 3,2 |
| **T** | **T0** | 5,4 ± 2,3 | 6,2 ± 2,5 | 3,1 ± 1,0 | 5,9 ± 2,4 | 21,7 ± 7,0 | 96,0 ± 28,5 | 84,5 ± 10,9 | 22,7 ± 5,2 | 2,5 ± 1,3 | 4,6 ± 2,8 |
|  | **T15** | 4,6 ± 2,1 | 5,2 ± 2,4 | 2,7 ± 1,0 | 5,2 ± 2,3 | 22,1 ± 7,0 | 100,0 ± 26,1 | 87,0 ± 11,2 | 23,5 ± 5,4 |  |  |
|  | **T30** | 4,4 ± 1,1 | 4,9 ± 1,6 | 2,6 ± 1,1 | 4,9 ± 2,2 | 22,0 ± 7,1 | 99,5 ± 28,1 | 87,1 ± 11,5 | 23,5 ± 5,4 |  |  |
|  | **T60** | 4,4 ± 2,3 | 4,9 ± 1,6 | 2,6 ± 1,1 | 4,9 ± 2,5 | 21,9 ± 7,2 | 99,1 ± 27,5 | 84,9 ± 11,2 | 22,8 ± 5,2 |  |  |
|  | **T180** | 3,9 ± 1,2 | 4,4 ± 1,0 | 3,1 ± 0,9 | 4,8 ± 2,9 | 23,1 ± 7,3 | 96,9 ± 31,9 | 85,1 ± 7,5 | 23,7 ± 3,4 | 2,7 ± 1,3 | 4,5 ± 1,9 |

PSI: pain severity index; PII: pain interference index; Lam.: lameness; VAS: visual analogue scale; CRF: circumference; ROM: range of motion; GLS: GAIT4Dog® lameness score; TPI %: total pressure index percentage; SS: synovial score; S: group S; HA group HA; T: group T; T0: baseline time; T15: 15 days from baseline time; T30: 30 days from baseline time; T60: 60 days from baseline time; T180: 180 days from baseline time.

**Supplementary Table 2S.** Mean values and standard deviations (mean ± SD) of the clinical and radiographic parameters measured in groups S, HA, and T at T0, T15, T30, T60 and T180.
